# Supplementary material
Source: MDPI journal article supplement (https://www.mdpi.com/2077-0472/12/1/54)
Supplement: s1 [file s1]

### Supplementary Materials:

**Table S1.** Ingredients and nutrient composition of basal diet (on an air-dried basis)

| Items (%)                  |       |
|----------------------------|-------|
| Ingredient                 |       |
| Corn (7.9)                 | 61.70 |
| Soybean meal (45)          | 26.09 |
| Corn protein flour (55)    | 7.90  |
| Dicalcium phosphate        | 1.40  |
| Limestone                  | 1.08  |
| Sodium chloride            | 0.38  |
| DL-Methionine              | 0.15  |
| L-Lysine                   | 0.20  |
| Choline chloride (50%)     | 0.10  |
| Premix                     | 1.001 |
| Total                      | 100   |
| Nutritional level          |       |
| Calculated nutrient        |       |
| Net energy (MJ/kg)         | 12.14 |
| CP (%)                     | 20.67 |
| Calcium (%)                | 0.90  |
| Total phosphorus (%)       | 0.68  |
| Non-phytate phosphorus (%) | 0.44  |
| Items(%)                   |       |
| Methionine (%)             | 0.48  |
| Methionine +cystine (%)    | 0.81  |
| Threonine (%)              | 0.75  |
| Tryptophane (%)            | 0.21  |

Note: Premix provided per kg of diet: Cu, 8 mg; Fe, 65 mg; Zn, 80 mg; Mn, 105 mg; I, 1 mg; Se, 0.3 mg; vitamin A, 9800 IU; vitamin D3, 3100IU; vitamin E, 26 IU; vitamin B1, 2.5 mg; vitamin B2, 7 mg; vitamin B12, 0.018 mg; vitamin K, 2.2 mg; biotin, 0.09 mg; folic acid, 1 mg; pantothenic acid, 11 mg; nicotinic acid, 38 mg.

**Table S2.** Primer sequences and product lengths of target gene fragments.

| Transcripts   | Accession number |         | Primer sequence (5'-3')  | Product (bp) | Length |
|---------------|------------------|---------|--------------------------|--------------|--------|
| <i>Keap1</i>  | MF774811.1       | Forward | TCACCCTCCATAAACCCACCCAAG | 102          |        |
|               |                  | Reverse | AGTAGCCCAAGGACTGCCGATAG  | 102          |        |
| <i>Nrf2</i>   | NM_001310777.1   | Forward | GTTGAATCATCTGCCTGTGG     | 171          |        |
|               |                  | Reverse | TAAGCTAGGTGGTCGAGTGC     | 172          |        |
| <i>HO-1</i>   | KU048806.1       | Forward | AAGAGCCAGGAGAACGGTCACC   | 139          |        |
|               |                  | Reverse | TGCCACCAGGTCTGTCTGAC     | 139          |        |
| <i>SOD1</i>   | XM_013097859.1   | Forward | CCTGTGGTGTTCATCGGAATA    | 116          |        |
|               |                  | Reverse | TTGAACGAGGAAGAGCAAGTA    | 127          |        |
| <i>GCLC</i>   | XM_027455104.1   | Forward | TTCAGGTGACATTCCAGGCTTGC  | 108          |        |
|               |                  | Reverse | AGAACGGAGATGCAGCACTCAATG | 108          |        |
| <i>GCLM</i>   | XM_027462629.1   | Forward | TGTTGTGTGATGCCACCTGATCTC | 150          |        |
|               |                  | Reverse | CCATTCGTGTGCTTTGACGTTCTG | 150          |        |
| <i>CYP1A1</i> | NM_205147.1      | Forward | AGGACGGAGGCTGACAAGGTG    | 104          |        |
|               |                  | Reverse | AGGATGGTGGTGAGGAAGAGGAAG | 104          |        |
| <i>CYP1A2</i> | XM_027466425.1   | Forward | CCACGCAGATCCCAAACGAG     | 120          |        |
|               |                  | Reverse | TGTGAGGGTACGTCACGAGG     | 120          |        |
| <i>CYP2A6</i> | KX687985.1       | Forward | CAGGCCCTCTCCTAAACAGATG   | 81           |        |
|               |                  | Reverse | AATGCAAACGGCACCTTCAGA    | 81           |        |
| <i>CYP3A4</i> | XM_015294357.2   | Forward | GGCAGCCTGTGATGGCTATT     | 95           |        |
|               |                  | Reverse | ACCAAAGACCCTGCGATTGG     | 95           |        |
| <i>CAT</i>    | KU048802.1       | Forward | TGTGCGTGACTGACAACCAAGG   | 96           |        |
|               |                  | Reverse | ACATGCGGCTCTCCTTCACAAC   | 96           |        |
| <i>NQO-1</i>  | XM_027466610.1   | Forward | CGTCGCCGAGCAGAAGAAGATC   | 195          |        |
|               |                  | Reverse | CTGGTGGTGAACGACAGCATGG   | 195          |        |
| <i>NLRP3</i>  | MH373356.1       | Forward | CGCTGAACGAGGACGCACTG     | 124          |        |
|               |                  | Reverse | TGGAAGGGTAGTCGGGACATAGC  | 124          |        |
| <i>TXNIP</i>  | XM_032204531.1   | Forward | GCTGCCAAGAAGGAGAAGAAGGTG | 130          |        |
|               |                  | Reverse | TGTTCTCGAAGTCGGCGTTGATG  | 130          |        |
| <i>IL-6</i>   | XM_027446016.1   | Forward | GCGGAACCAAGAGCAGAGATGAG  | 130          |        |
|               |                  | Reverse | CCACGGCAGGACTGGATAATAACC | 130          |        |
| <i>IL-18</i>  | NM_001310420.1   | Forward | GGCTCTGTCCCAAGGCAGGAG    | 124          |        |
|               |                  | Reverse | GCCACTCTGCGTCAGCTTCAC    | 124          |        |
| <i>GST</i>    | LOC101797566     | Forward | ACAAGGCTGCAACCAGATACTTCC | 178          |        |
|               |                  | Reverse | ACTGCACATCTGCTCTGCTAAGC  | 178          |        |
| <i>GPX</i>    | XM_027459004.1   | Forward | GAACGGCACCAACGAGGAGATC   | 99           |        |
|               |                  | Reverse | TTCACCTGGCACTTCTGGAACAG  | 99           |        |
| <i>GAPDH</i>  | EF667345.1       | Forward | ATGTCGCCCTGGATTTTCG      | 62           |        |
|               |                  | Reverse | CACAGGACTCCATACCCAAGAA   | 62           |        |

Keap1: Kelch-like ECH-associated protein 1; Nrf2: Nuclear Factor E2-related Factor 2; HO-1: Heme oxygenase-1; SOD1: Superoxide dismutase 1; GCLC: Glutamate-cysteine ligase modifier subunit; GCLM: Glutamate-cysteine ligase modifier subunit; CYP1A1: Cytochrome P4501A1; CYP1A2: Cytochrome P4501A2; CYP2A6: Cytochrome P4502A6; CYP3A4: Cytochrome P4503A4; CAT: Catalase; NQO-1: NADPH quinoneoxidoreductase-1; NLRP3: Nod-like receptor families pyrin domain containing 3; TXNIP: Thioredoxin interacting protein; GSH-Px: Glutathione peroxidase; IL-6: Interleukin-6; IL-18: Interleukin-18.
